# Supplementary material for: Universal versus conditional day 3 follow-up for children with non-severe unclassified fever at the community level in Ethiopia: A cluster-randomised non-inferiority trial
Source: PLoS Med. 2018 Apr 17;15(4):e1002553. doi: 10.1371/journal.pmed.1002553 (PMC5903591; doi:10.1371/journal.pmed.1002553)
Supplement: S1 Table — (XLSX) [file pmed.1002553.s003.xlsx]

## Sheet: survey
type	name	caption	hint	relevant	appearance	constraint	constraint message	required	calculation	default	media:image:english	choice_filter	read only	disabled	repeat_count
note	NOTE_INTRO	MC Ethiopia TRAction iCCM Non-Inferiority Trial - Enrolment form (EF)
note	B_NOTE	Instruction: Fill this form once for each child who is eligible to participate in the study. The child must meet our criteria for fever of non-specified origin in order to be eligible.
integer	HEWID	HEW ID	3 digit number					Yes
date	date	Date	Today's date
begin group	FF	FAMILY FOLDER			field-list
integer	GOT	Gote number						Yes
integer	HH	Household number						Yes
integer	CHILD_ID	Individual child number						Yes
end group
text	CHILD_NAME	Child Name						Yes
text	Caregiver_Name	Caregiver Name						Yes
select_one WOREDA_CHOICE	WOREDA	Woreda						Yes
select_one HCH_CHOICE	HEALTH_CENTRE_HALABA	Health centre catchment area in Halaba		${WOREDA}=1				Yes
select_one HCBS_CHOICE	HEALTH_CENTRE_BOLOSO_SORE	Health centre catchment area in Boloso Sore		${WOREDA}=2				Yes
select_one HCDG_CHOICE	HEALTH_CENTRE_DAMOT_GALE	Health centre catchment area in Damot Gale		${WOREDA}=3				Yes
select_one KEBELEAJO_CHOICE	KEBELE_AJO_HULUKO	Kebeles in Ajo Huluko		${HEALTH_CENTRE_HALABA}=1				Yes
select_one KEBELEARSHO_CHOICE	KEBELE_ARSHO	Kebeles in Arsho		${HEALTH_CENTRE_HALABA}=2				Yes
select_one KEBELEASHOKA_CHOICE	KEBELE_ASHOKA	Kebeles in Ashoka		${HEALTH_CENTRE_HALABA}=3				Yes
select_one KEBELEBESHENO_CHOICE	KEBELE_BESHENO	Kebeles in Besheno		${HEALTH_CENTRE_HALABA}=4				Yes
select_one KEBELEDINEKOSHA_CHOICE	KEBELE_DINEKOSHA	Kebeles in Dinekosha		${HEALTH_CENTRE_HALABA}=5				Yes
select_one KEBELEGUBA_CHOICE	KEBELE_GUBA	Kebeles in Guba		${HEALTH_CENTRE_HALABA}=6				Yes
select_one KEBELEHALABA_CHOICE	KEBELE_HALABA	Kebeles in Halaba		${HEALTH_CENTRE_HALABA}=7				Yes
select_one KEBELEKONISHA_CHOICE	KEBELE_KONISHA	Kebeles in Konisha		${HEALTH_CENTRE_HALABA}=8				Yes
select_one KEBELETUKA_CHOICE	KEBELE_TUKA	Kebeles in Tuka		${HEALTH_CENTRE_HALABA}=9				Yes
select_one KEBELEWEJEGOYATO_CHOICE	KEBELE_WEJGOYATO	Kebeles in Wejgoyato		${HEALTH_CENTRE_HALABA}=10				Yes
select_one KEBELEACHURA_CHOICE	KEBELE_ACHURA	Kebeles in Achura		${HEALTH_CENTRE_BOLOSO_SORE}=1				Yes
select_one KEBELEAFAMABANCHA_CHOICE	KEBELE_AFAMABANCHA	Kebeles in Afamabancha		${HEALTH_CENTRE_BOLOSO_SORE}=2				Yes
select_one KEBELEDANGARASALATA_CHOICE	KEBELE_DANGARASALATA	Kebeles in Dangarasalata		${HEALTH_CENTRE_BOLOSO_SORE}=3				Yes
select_one KEBELEGARAGODO_CHOICE	KEBELE_GARAGODO	Kebeles in Garagodo		${HEALTH_CENTRE_BOLOSO_SORE}=4				Yes
select_one KEBELEGURMOKOYSHA_CHOICE	KEBELE_GURMOKOYSHA	Kebeles in Gurmokoysha		${HEALTH_CENTRE_BOLOSO_SORE}=5				Yes
select_one KEBELEHIMBECHO_CHOICE	KEBELE_HIMBECHO	Kebeles in Himbecho		${HEALTH_CENTRE_BOLOSO_SORE}=6				Yes
select_one KEBELELEGAMA_CHOICE	KEBELE_LEGAMA	Kebeles in Legama		${HEALTH_CENTRE_BOLOSO_SORE}=7				Yes
select_one KEBELEWEYBO_CHOICE	KEBELE_WEYBO	Kebeles in Weybo		${HEALTH_CENTRE_BOLOSO_SORE}=8				Yes
select_one KEBELEADECHEREKE_CHOICE	KEBELE_ADECHEREKE	Kebeles in Adechereke		${HEALTH_CENTRE_DAMOT_GALE}=1				Yes
select_one KEBELEBUGE_CHOICE	KEBELE_BUGE	Kebeles in Buge		${HEALTH_CENTRE_DAMOT_GALE}=2				Yes
select_one KEBELEDAMOTMEKONISA_CHOICE	KEBELE_DAMOT_MEKONISA	Kebeles in Damot Mekonisa		${HEALTH_CENTRE_DAMOT_GALE}=3				Yes
select_one KEBELEGACHENO_CHOICE	KEBELE_GACHENO	Kebeles in Gacheno		${HEALTH_CENTRE_DAMOT_GALE}=4				Yes
select_one KEBELEWOBEJEGE_CHOICE	KEBELE_WOBEJEGE	Kebeles in Wobejege		${HEALTH_CENTRE_DAMOT_GALE}=5				Yes
select_one KEBELEWOGERA_CHOICE	KEBELE_WOGERA	Kebeles in Wogera		${HEALTH_CENTRE_DAMOT_GALE}=6				Yes
select_one KEBELEWONDARAGALE_CHOICE	KEBELE_WONDARA_GALE	Kebeles in Wondara Gale		${HEALTH_CENTRE_DAMOT_GALE}=7				Yes
select_one CONSENT_CHOICE	CONSENT	Consent						Yes
begin group	CHILD			${CONSENT}=2				Yes
select_one YES_NO	CHILD_AGE	Was ${CHILD_NAME} between 2 and 59 months?						Yes
end group
begin group	DATE			${CHILD_AGE}=1				Yes
integer	YOB	What year was ${CHILD_NAME} born?	Use Ethiopian year			.<=2009 and .>=2003	Year can only be between 2003 and 2009	Yes
integer	MOB	What month was ${CHILD_NAME} born?	Use Ethiopian month			.<=13 and .>=1	Month can only be between 1 and 13	Yes		2012-04-01
select_one SEX_CHOICE	SEX	Sex?						Yes
select_one YES_NO	WEIGHT	Is the weight known?
decimal	WEIGHTKG	What was the weight?	Give weight in KG with one decimal	${WEIGHT}=1		.<25 and .>1	Weight can only be between 1 and 25 kg.	Yes
select_one YES_NO	SIGNS	History or presence of danger signs or referral signs?						Yes
end group
begin group	TEMP			${SIGNS}=2				Yes
select_one YES_NO	CHILD_T_MEASURED	Temperature measured?						Yes
decimal	CHILD_T	Fill in temperature	Give temperature with one decimal	${CHILD_T_MEASURED}='1'		.<44 and .>33	Temperature can only be between 33 and 44 degrees.	Yes
select_one YES_NO	CHILD_HT	Hot to touch?		${CHILD_T_MEASURED}=2 or ${CHILD_T}<37.5				Yes
select_one YES_NO	FEVER_REPORT	Reported fever in past two days?		${CHILD_HT}=2				Yes
select_one RDT_CHOICE	RDT_RESULT	RDT result?		${CHILD_T}>=37.5 or ${FEVER_REPORT}=1				Yes
select_one YES_NO	COUGH_DB	Cough?						Yes
select_one YES_NO	RESPIRATOY_R	Fast breathing?		${COUGH_DB}=1				Yes
select_one YES_NO	DIARRHOEA	Diarrhoea?						Yes
end group
note	NOTE_finished	End. Thank you for filling in the data. Go to the next screen to save your questionnaire.
set form title	ENROLMENT_ENGLISH
set form id	ENROLMENT-02
today	today
start	start
end	end
deviceid	deviceid
phonenumber	num_tel

## Sheet: choices
list name	name	caption
A1CHOICE	1	Same
A1CHOICE	2	Better
A1CHOICE	3	Worse
A1CHOICE	4	Dead
A1CHOICE	5	Unknown
YES_NO	1	Yes
YES_NO	2	No
TEMPERATURE	1	Hot to touch (now)
TEMPERATURE	2	Reported fever in past two days
RDT_RDT	1	Positive
RDT_RDT	2	Negative
RDT_RDT	3	Not done
OTHER_MEDICINE	1	No
OTHER_MEDICINE	2	Don't know
OTHER_MEDICINE	3	Yes
YES_NO_DONTKNOW	1	No
YES_NO_DONTKNOW	2	Yes
YES_NO_DONTKNOW	3	Don't know
SEX_CHOICE	1	Male
SEX_CHOICE	2	Female
CONSENT_CHOICE	1	Refused - END
CONSENT_CHOICE	2	Agreed
RDT_CHOICE	1	Positive
RDT_CHOICE	2	Negative
RDT_CHOICE	3	Indeterminate
RDT_CHOICE	4	Didn't perform RDT test
WOREDA_CHOICE	1	Halaba
WOREDA_CHOICE	2	Boloso Sore
WOREDA_CHOICE	3	Damot Gale
HCH_CHOICE	1	Ajo Huluko HC
HCH_CHOICE	2	Arsho HC
HCH_CHOICE	3	Ashoka HC
HCH_CHOICE	4	Besheno Hospital
HCH_CHOICE	5	Dinekosa HC
HCH_CHOICE	6	Guba HC
HCH_CHOICE	7	Halaba HC
HCH_CHOICE	8	Konicha HC
HCH_CHOICE	9	Tuka HC
HCH_CHOICE	10	Wejegoyato HC
KEBELEAJO_CHOICE	1	Ajo huluko
KEBELEAJO_CHOICE	2	Anshekora buti
KEBELEAJO_CHOICE	3	Negele Widisha
KEBELEAJO_CHOICE	4	Tita Libtera
KEBELEARSHO_CHOICE	1	Holegeba Kuke
KEBELEARSHO_CHOICE	2	lay Arsho
KEBELEARSHO_CHOICE	3	Mirab Gurtancho
KEBELEARSHO_CHOICE	4	Misrak Gurtancho
KEBELEARSHO_CHOICE	5	Tach arsho
KEBELEASHOKA_CHOICE	1	1st Ashoka
KEBELEASHOKA_CHOICE	2	1st Mekala
KEBELEASHOKA_CHOICE	3	2nd Ashoka
KEBELEASHOKA_CHOICE	4	2nd mekala A
KEBELEASHOKA_CHOICE	5	2nd mekala B
KEBELEASHOKA_CHOICE	6	Asore
KEBELEASHOKA_CHOICE	7	Meja
KEBELEBESHENO_CHOICE	1	Behsheno
KEBELEBESHENO_CHOICE	2	Bubisa
KEBELEBESHENO_CHOICE	3	Chobare Meno
KEBELEBESHENO_CHOICE	4	Hantezo
KEBELEBESHENO_CHOICE	5	Kulubi
KEBELEBESHENO_CHOICE	6	Kulufo
KEBELEBESHENO_CHOICE	7	Udana choloksa
KEBELEBESHENO_CHOICE	8	Udana meno
KEBELEBESHENO_CHOICE	9	Woteta
KEBELEBESHENO_CHOICE	10	Bubisa
KEBELEBESHENO_CHOICE	11	Simbita
KEBELEDINEKOSHA_CHOICE	1	Chambula
KEBELEDINEKOSHA_CHOICE	2	Dinekosa
KEBELEDINEKOSHA_CHOICE	3	Eloleka
KEBELEDINEKOSHA_CHOICE	4	Gerema
KEBELEDINEKOSHA_CHOICE	5	Mude Moyafa
KEBELEDINEKOSHA_CHOICE	6	Wishamo
KEBELEGUBA_CHOICE	1	1st Ansha
KEBELEGUBA_CHOICE	2	2nd Ansha
KEBELEGUBA_CHOICE	3	Debeso
KEBELEGUBA_CHOICE	4	Falka
KEBELEGUBA_CHOICE	5	Guba sherero
KEBELEGUBA_CHOICE	6	Gufesa
KEBELEGUBA_CHOICE	7	Gurara
KEBELEGUBA_CHOICE	8	Kunhe yeye
KEBELEGUBA_CHOICE	9	Shewako
KEBELEGUBA_CHOICE	10	Sinkele Bitena
KEBELEGUBA_CHOICE	11	Yeye
KEBELEHALABA_CHOICE	1	1st choroko
KEBELEHALABA_CHOICE	2	2nd choroko
KEBELEHALABA_CHOICE	3	Alemtena
KEBELEHALABA_CHOICE	4	Galeto
KEBELEHALABA_CHOICE	5	Gedeba
KEBELEHALABA_CHOICE	6	Habibo
KEBELEHALABA_CHOICE	7	Hamata
KEBELEHALABA_CHOICE	8	Kufe
KEBELEHALABA_CHOICE	9	Lay bedene
KEBELEHALABA_CHOICE	10	Lay lenda
KEBELEHALABA_CHOICE	11	Shekate
KEBELEHALABA_CHOICE	12	Tach bedene
KEBELEHALABA_CHOICE	13	Tach Lenda
KEBELEHALABA_CHOICE	14	Wajga
KEBELEKONISHA_CHOICE	1	1st Konicha
KEBELEKONISHA_CHOICE	2	1st Tefo
KEBELEKONISHA_CHOICE	3	2nd Konicha
KEBELEKONISHA_CHOICE	4	2nd Tefo
KEBELEKONISHA_CHOICE	5	Kobo Geto
KEBELEKONISHA_CHOICE	6	Kobo Chobare
KEBELEKONISHA_CHOICE	7	Rokenene Tefo
KEBELETUKA_CHOICE	1	1st Toka
KEBELETUKA_CHOICE	2	2nd Toka
KEBELETUKA_CHOICE	3	Gerene
KEBELETUKA_CHOICE	4	Haymele
KEBELETUKA_CHOICE	5	Lay tuka
KEBELETUKA_CHOICE	6	Sorge
KEBELETUKA_CHOICE	7	Tefo chufo
KEBELETUKA_CHOICE	8	Yambo
KEBELEWEJEGOYATO_CHOICE	1	Alke Gero
KEBELEWEJEGOYATO_CHOICE	2	Buko Tibame
KEBELEWEJEGOYATO_CHOICE	3	Doda Bereho
KEBELEWEJEGOYATO_CHOICE	4	Mito Dubela
KEBELEWEJEGOYATO_CHOICE	5	Wejegoyato
KEBELEWEJEGOYATO_CHOICE	6	Yato Bereho
HCBS_CHOICE	1	Achura HC
HCBS_CHOICE	2	Afama Bancha HC
HCBS_CHOICE	3	Dangara Salata HC
HCBS_CHOICE	4	Gara Godo HC
HCBS_CHOICE	5	Gurmo Koysha HC
HCBS_CHOICE	6	Himbecho HC
HCBS_CHOICE	7	Legama HC
HCBS_CHOICE	8	Weybo HC
KEBELEACHURA_CHOICE	1	Achura
KEBELEACHURA_CHOICE	2	Tiyo Himbecho
KEBELEACHURA_CHOICE	3	Worwema
KEBELEACHURA_CHOICE	4	Mage
KEBELEACHURA_CHOICE	5	Dijala
KEBELEACHURA_CHOICE	6	Achura hawo
KEBELEAFAMABANCHA_CHOICE	1	Afama Adala
KEBELEAFAMABANCHA_CHOICE	2	Afama Garo
KEBELEAFAMABANCHA_CHOICE	3	Afama Bancha
KEBELEAFAMABANCHA_CHOICE	4	Dubo
KEBELEAFAMABANCHA_CHOICE	5	Sore homba
KEBELEAFAMABANCHA_CHOICE	6	Afama garo pulasa
KEBELEDANGARASALATA_CHOICE	1	Dangara madalecho
KEBELEDANGARASALATA_CHOICE	2	Dangara selata
KEBELEDANGARASALATA_CHOICE	3	Hajo selata
KEBELEGARAGODO_CHOICE	1	Admancho Arfita
KEBELEGARAGODO_CHOICE	2	Basa Gofera
KEBELEGARAGODO_CHOICE	3	Dachi Gofera
KEBELEGARAGODO_CHOICE	4	Gara Godo town
KEBELEGARAGODO_CHOICE	5	Ulbo dache
KEBELEGARAGODO_CHOICE	6	Admancho pulasa
KEBELEGARAGODO_CHOICE	7	Gofara ulba
KEBELEGARAGODO_CHOICE	8	Challa
KEBELEGURMOKOYSHA_CHOICE	1	Dolla
KEBELEGURMOKOYSHA_CHOICE	2	Gurmo Koysha
KEBELEGURMOKOYSHA_CHOICE	3	Yukara
KEBELEHIMBECHO_CHOICE	1	Chama Himbecho
KEBELEHIMBECHO_CHOICE	2	Gido Homba
KEBELEHIMBECHO_CHOICE	3	Matala Himbecho
KEBELEHIMBECHO_CHOICE	4	Shuno Humba
KEBELELEGAMA_CHOICE	1	Tokisa Gado
KEBELELEGAMA_CHOICE	2	Legama
KEBELELEGAMA_CHOICE	3	Tadsa
KEBELEWEYBO_CHOICE	1	Lome Korke
KEBELEWEYBO_CHOICE	2	Korke Dege
KEBELEWEYBO_CHOICE	3	Woybo Dege
KEBELEWEYBO_CHOICE	4	Woybo Woga
KEBELEWEYBO_CHOICE	5	Afama mino
HCDG_CHOICE	1	Ade Chereke HC
HCDG_CHOICE	2	Buge HC
HCDG_CHOICE	3	Damot Mekonisa HC
HCDG_CHOICE	4	Gacheno HC
HCDG_CHOICE	5	Jage HC
HCDG_CHOICE	6	Wegera HC
HCDG_CHOICE	7	Wandara Gale HC
KEBELEADECHEREKE_CHOICE	1	Ade Arro
KEBELEADECHEREKE_CHOICE	2	Ade Damot
KEBELEADECHEREKE_CHOICE	3	Ade offa
KEBELEADECHEREKE_CHOICE	4	Arro wogera
KEBELEADECHEREKE_CHOICE	5	Hagaza Doge
KEBELEBUGE_CHOICE	1	Buge
KEBELEBUGE_CHOICE	2	Damot offa
KEBELEBUGE_CHOICE	3	Harato Burkito
KEBELEBUGE_CHOICE	4	Harato kontola
KEBELEBUGE_CHOICE	5	Shakiso shone
KEBELEDAMOTMEKONISA_CHOICE	1	Damot Mekonisa
KEBELEDAMOTMEKONISA_CHOICE	2	Mekonisa Woyge
KEBELEGACHENO_CHOICE	1	Ade Koysha
KEBELEGACHENO_CHOICE	2	Gacheno
KEBELEGACHENO_CHOICE	3	Toba
KEBELEWOBEJEGE_CHOICE	1	Akabilo
KEBELEWOBEJEGE_CHOICE	2	Damot boloso
KEBELEWOBEJEGE_CHOICE	3	Kunasa Fulasas
KEBELEWOBEJEGE_CHOICE	4	Wobe Jege
KEBELEWOBEJEGE_CHOICE	5	Zegere
KEBELEWOGERA_CHOICE	1	Bala koysha
KEBELEWOGERA_CHOICE	2	Chocha
KEBELEWOGERA_CHOICE	3	Fate
KEBELEWOGERA_CHOICE	4	Shasha
KEBELEWOGERA_CHOICE	5	Wogera
KEBELEWOGERA_CHOICE	6	Woshi Gale
KEBELEWONDARAGALE_CHOICE	1	Ade Sibaye
KEBELEWONDARAGALE_CHOICE	2	Sibaye Korke
KEBELEWONDARAGALE_CHOICE	3	Wondara Boloso
KEBELEWONDARAGALE_CHOICE	4	Wondara Gale
KEBELEWONDARAGALE_CHOICE	5	Zamine Sibaye
